# Supplementary material for: Predicting Impacts of Climate Change on Northward Range Expansion of Invasive Weeds in South Korea
Source: MDPI journal article supplement (doi:10.3390/plants10081604), 2021-08-05
Supplement: s1 [file s1]

**Table S1.** Pearson's correlation for bioclimatic variable selection

| Variable | Bio1  | Bio2  | Bio3  | Bio4  | Bio5  | Bio6  | Bio7  | Bio8  | Bio9  | Bio10 | Bio11 | Bio12 | Bio13 | Bio14 | Bio15 | Bio16 | Bio17 | Bio18 | Bio19 | d-water |
|----------|-------|-------|-------|-------|-------|-------|-------|-------|-------|-------|-------|-------|-------|-------|-------|-------|-------|-------|-------|---------|
| Bio2     | -0.28 |       |       |       |       |       |       |       |       |       |       |       |       |       |       |       |       |       |       |         |
| Bio3     | 0.03  | 0.83  |       |       |       |       |       |       |       |       |       |       |       |       |       |       |       |       |       |         |
| Bio4     | -0.57 | 0.60  | 0.07  |       |       |       |       |       |       |       |       |       |       |       |       |       |       |       |       |         |
| Bio5     | 0.85  | 0.20  | 0.31  | -0.10 |       |       |       |       |       |       |       |       |       |       |       |       |       |       |       |         |
| Bio6     | 0.90  | -0.58 | -0.16 | -0.84 | 0.56  |       |       |       |       |       |       |       |       |       |       |       |       |       |       |         |
| Bio7     | -0.50 | 0.83  | 0.40  | 0.94  | 0.02  | -0.82 |       |       |       |       |       |       |       |       |       |       |       |       |       |         |
| Bio8     | 0.92  | -0.03 | 0.12  | -0.24 | 0.96  | 0.69  | -0.17 |       |       |       |       |       |       |       |       |       |       |       |       |         |
| Bio9     | 0.92  | -0.46 | -0.03 | -0.80 | 0.62  | 0.97  | -0.74 | 0.74  |       |       |       |       |       |       |       |       |       |       |       |         |
| Bio10    | 0.89  | -0.01 | 0.08  | -0.14 | 0.96  | 0.63  | -0.10 | 0.98  | 0.68  |       |       |       |       |       |       |       |       |       |       |         |
| Bio11    | 0.95  | -0.43 | -0.01 | -0.78 | 0.68  | 0.98  | -0.72 | 0.79  | 0.98  | 0.73  |       |       |       |       |       |       |       |       |       |         |
| Bio12    | 0.04  | -0.40 | -0.24 | -0.38 | -0.22 | 0.23  | -0.43 | -0.14 | 0.26  | -0.14 | 0.17  |       |       |       |       |       |       |       |       |         |
| Bio13    | -0.48 | 0.19  | -0.14 | 0.57  | -0.30 | -0.56 | 0.47  | -0.32 | -0.52 | -0.25 | -0.56 | 0.42  |       |       |       |       |       |       |       |         |
| Bio14    | 0.08  | -0.44 | -0.25 | -0.43 | -0.20 | 0.29  | -0.49 | -0.08 | 0.27  | -0.13 | 0.23  | 0.41  | -0.23 |       |       |       |       |       |       |         |
| Bio15    | -0.48 | 0.44  | -0.02 | 0.85  | -0.12 | -0.70 | 0.76  | -0.21 | -0.67 | -0.12 | -0.66 | -0.19 | 0.77  | -0.68 |       |       |       |       |       |         |
| Bio16    | -0.32 | -0.07 | -0.23 | 0.23  | -0.31 | -0.29 | 0.13  | -0.30 | -0.25 | -0.25 | -0.32 | 0.74  | 0.88  | -0.09 | 0.51  |       |       |       |       |         |
| Bio17    | 0.21  | -0.51 | -0.18 | -0.67 | -0.15 | 0.48  | -0.68 | -0.04 | 0.46  | -0.09 | 0.41  | 0.51  | -0.35 | 0.94  | -0.83 | -0.11 |       |       |       |         |
| Bio18    | -0.37 | 0.11  | -0.09 | 0.34  | -0.27 | -0.38 | 0.27  | -0.28 | -0.34 | -0.24 | -0.40 | 0.61  | 0.92  | -0.16 | 0.60  | 0.96  | -0.22 |       |       |         |
| Bio19    | 0.21  | -0.51 | -0.19 | -0.67 | -0.15 | 0.47  | -0.68 | -0.03 | 0.46  | -0.09 | 0.41  | 0.52  | -0.35 | 0.94  | -0.83 | -0.10 | 1.00  | -0.22 |       |         |
| d-water  | -0.13 | -0.20 | -0.15 | -0.15 | -0.27 | 0.01  | -0.19 | -0.22 | 0.02  | -0.22 | -0.04 | 0.21  | 0.00  | 0.27  | -0.17 | 0.05  | 0.29  | 0.00  | 0.32  |         |
| SSP1     | -0.09 | 0.00  | 0.02  | -0.02 | -0.11 | -0.05 | -0.01 | -0.11 | -0.05 | -0.11 | -0.06 | 0.02  | 0.02  | -0.01 | 0.01  | 0.03  | 0.00  | 0.02  | 0.01  | 0.05    |
