# Supplementary material for: Predicting Impacts of Climate Change on Northward Range Expansion of Invasive Weeds in South Korea
Source: MDPI journal article supplement (doi:10.3390/plants10081604), 2021-08-05
Supplement: s1 [file s1]

**Figure S1a-p.** The Jackknife test results for indicating the relative contribution of environmental variable for modeling different invasive weeds. **S1a**, *Apium leptophyllum*; **S1b**, *Astragalus sinicus*; **S1c**, *Bromus unioloides*; **S1d**, *Chenopodium ambrosioides*; **S1e**, *Coronopus didymus*; **S1f**, *Gnaphalium calviceps*; **S1g**, *Lolium multiflorum* var. *multiflorum*; **S1h**, *Modiola caroliniana*; **S1i**, *Oenothera laciniata*; **S1j**, *Paspalum dilatatum*; **S1k**, *Sida rhombifolia*; **S1l**, *Silene gallica* var. *gallica*; **S1m**, *Sisymbrium officinale*; **S1n**, *Sisyrinchium angustifolium*; **S1o**, *Spergularia rubra*; **S1p**, *Malva parviflora*.

**Figure S2a-p.** The area under the receiver operating characteristics (ROC) curve for determining the model's goodness of fit under the current climate. **S2a**, *Apium leptophyllum*; **S2b**, *Astragalus sinicus*; **S2c**, *Bromus unioloides*; **S2d**, *Chenopodium ambrosioides*; **S2e**, *Coronopus didymus*; **S2f**, *Gnaphalium calviceps*; **S2g**, *Lolium multiflorum* var. *multiflorum*; **S2h**, *Modiola caroliniana*; **S2i**, *Oenothera laciniata*; **S2j**, *Paspalum dilatatum*; **S2k**, *Sida rhombifolia*; **S2l**, *Silene gallica* var. *gallica*; **S2m**, *Sisymbrium officinale*; **S2n**, *Sisyrinchium angustifolium*; **S2o**, *Spergularia rubra*; **S2p**, *Malva parviflora*.

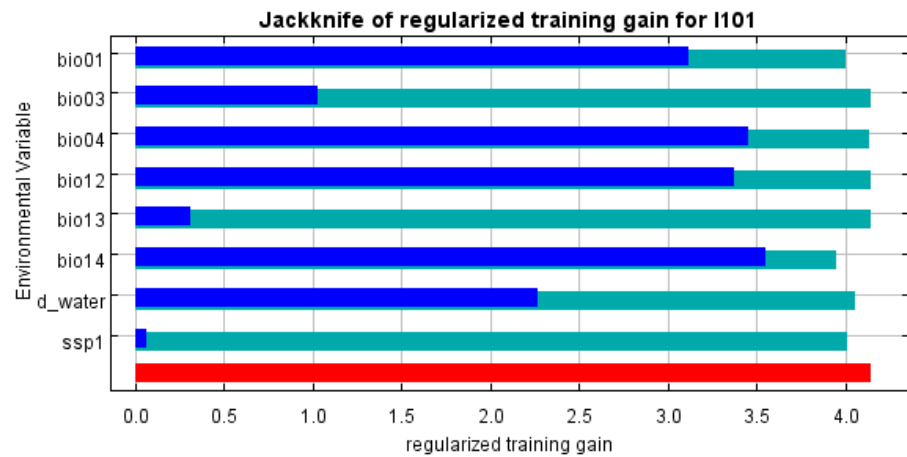

Figure S1a. The Jackknife test results for indicating the relative contribution of environmental variables for *Apium leptophyllum*

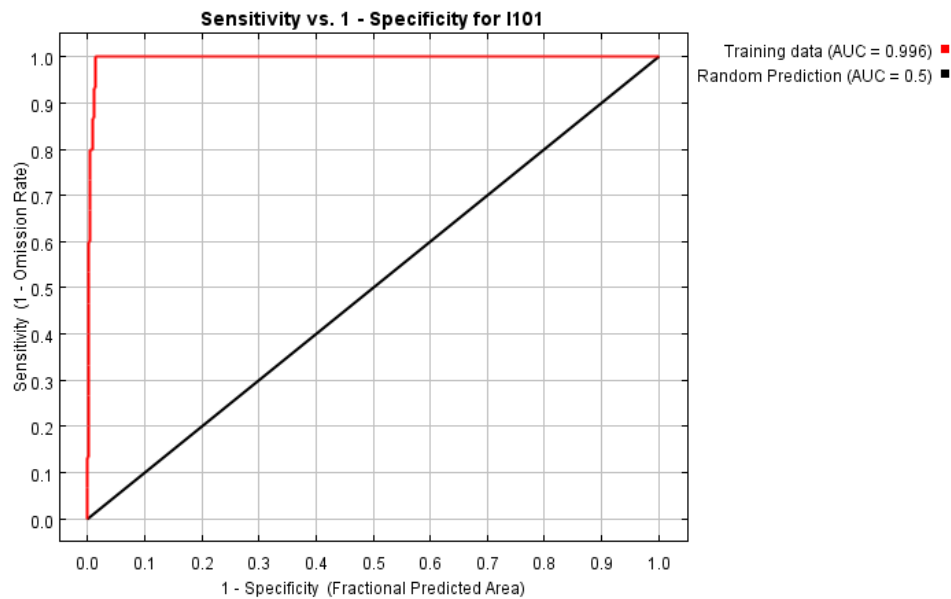

Figure S2a. The ROC curve for *Apium leptophyllum* under current climate.

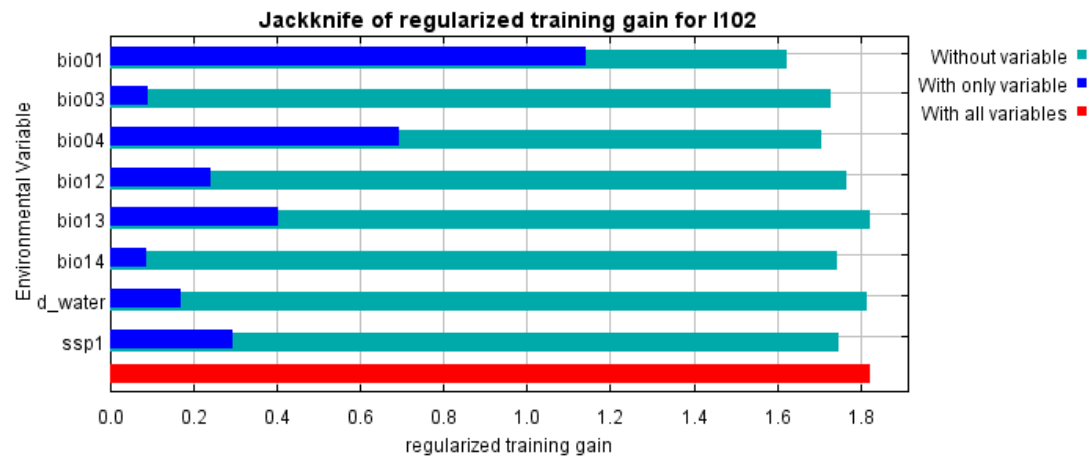

Figure S1b. The Jackknife test results for indicating the relative contribution of environmental variables for *Astragalus sinicus*

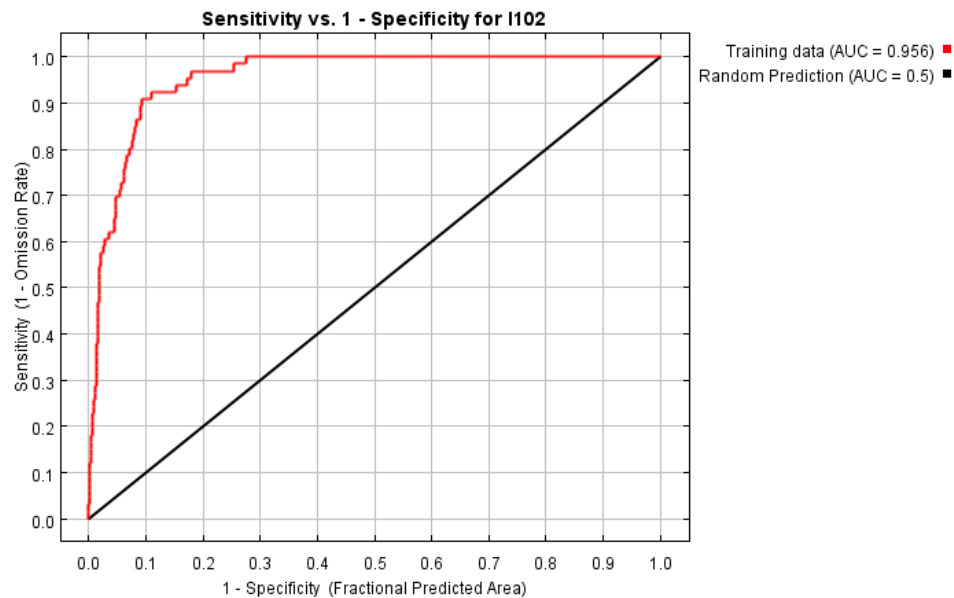

Figure S2b. The ROC curve for *Astragalus sinicus* under current climate.

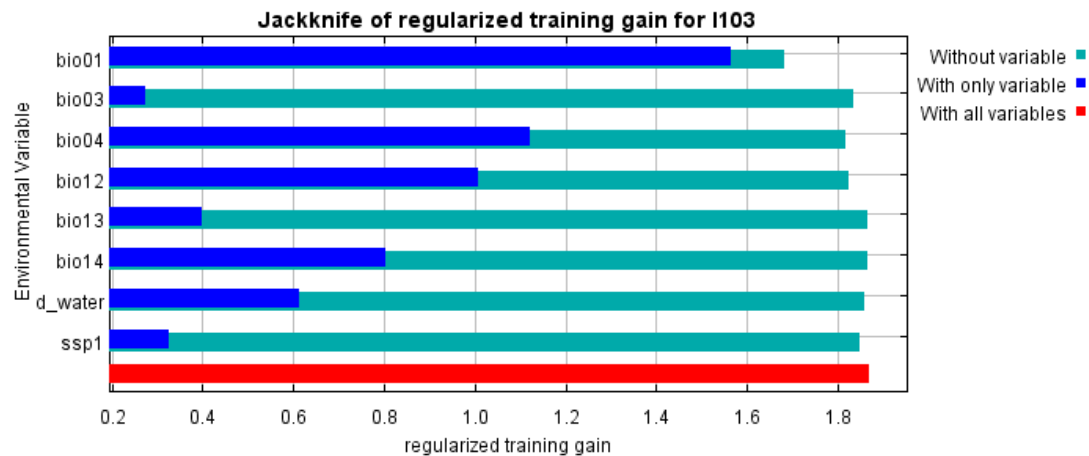

Figure S1c. The Jackknife test results for indicating the relative contribution of environmental variables for *Bromus unioloides*

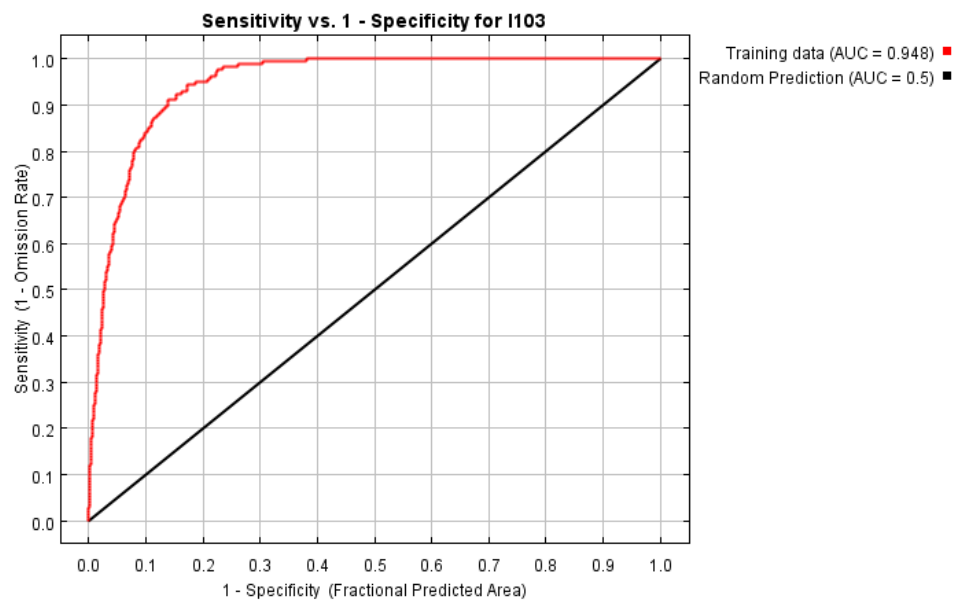

Figure S2c. The ROC curve for *Bromus unioloides* under current climate.

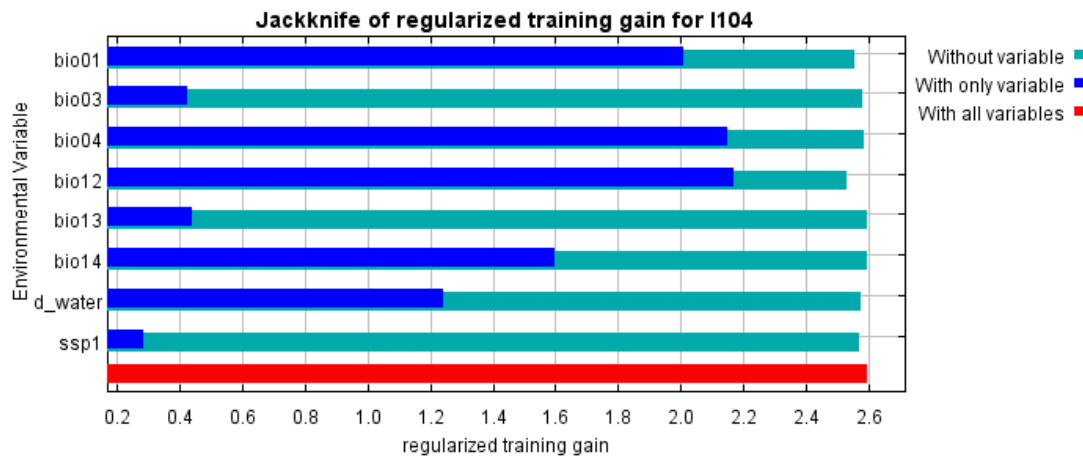

Figure S1d. The Jackknife test results for indicating the relative contribution of environmental variables for *Chenopodium ambrosioides*

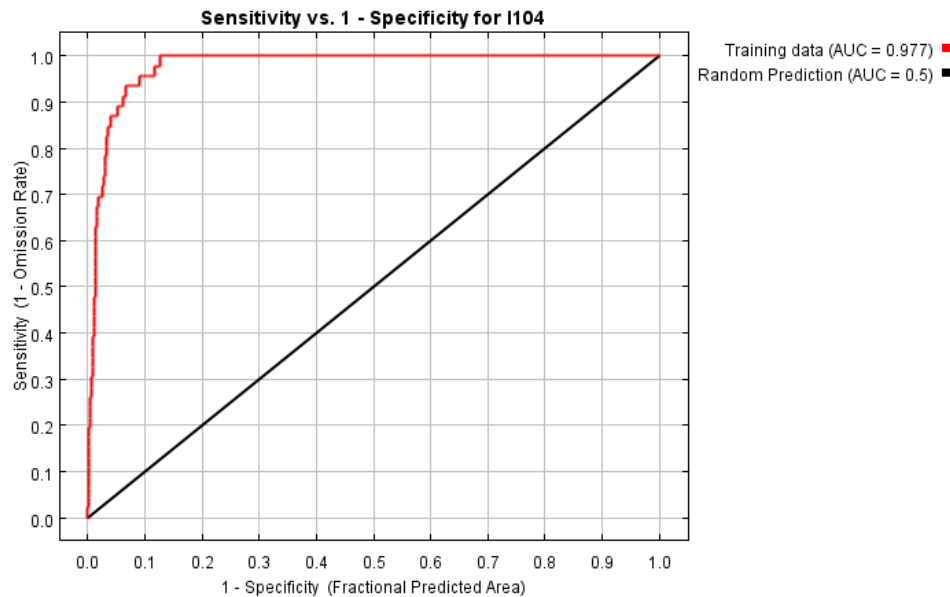

Figure S2d. The ROC curve for *Chenopodium ambrosioides* under current climate.

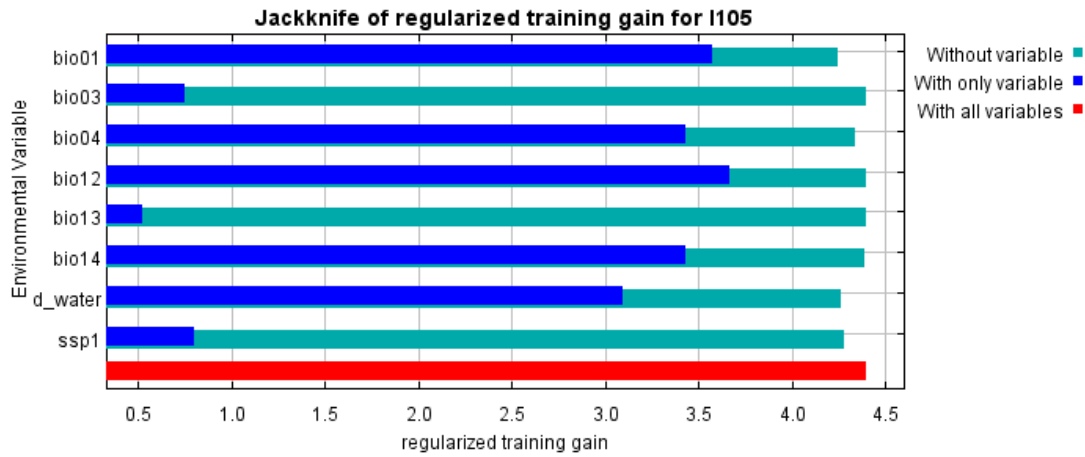

Figure S1e. The Jackknife test results for indicating the relative contribution of environmental variables for *Coronopus didymus*.

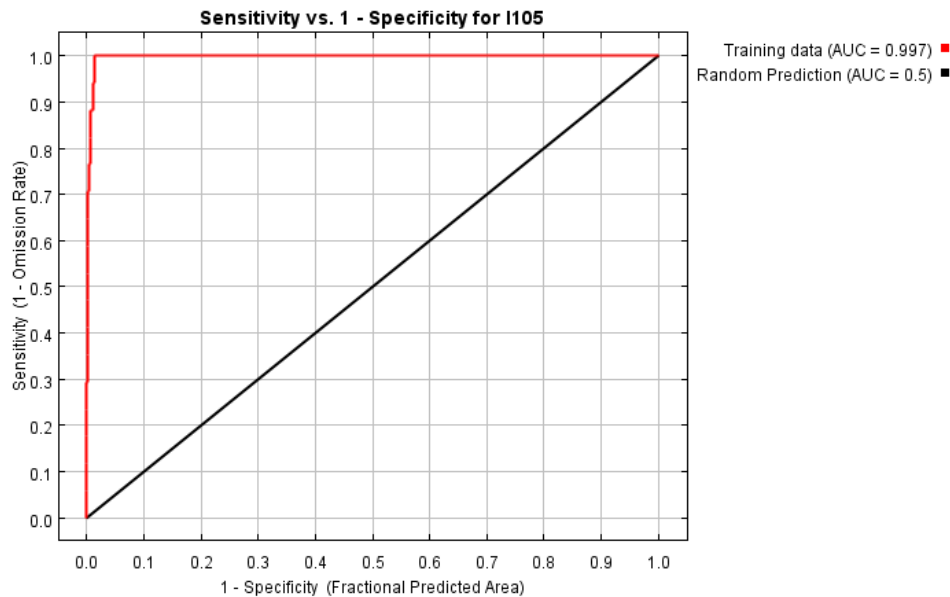

Figure S2e. The ROC curve for *Coronopus didymus* under current climate.

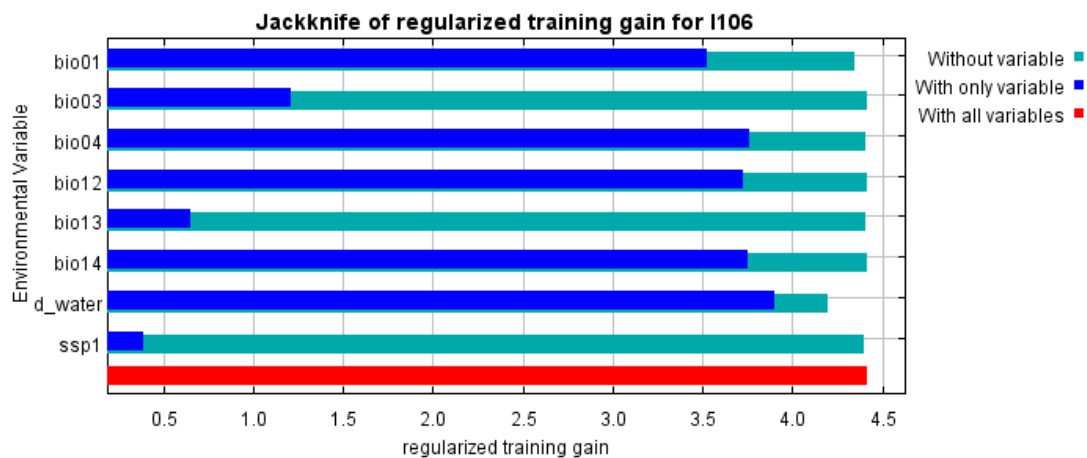

Figure S1f. The Jackknife test results for indicating the relative contribution of environmental variables for *Gnaphalium calviceps*

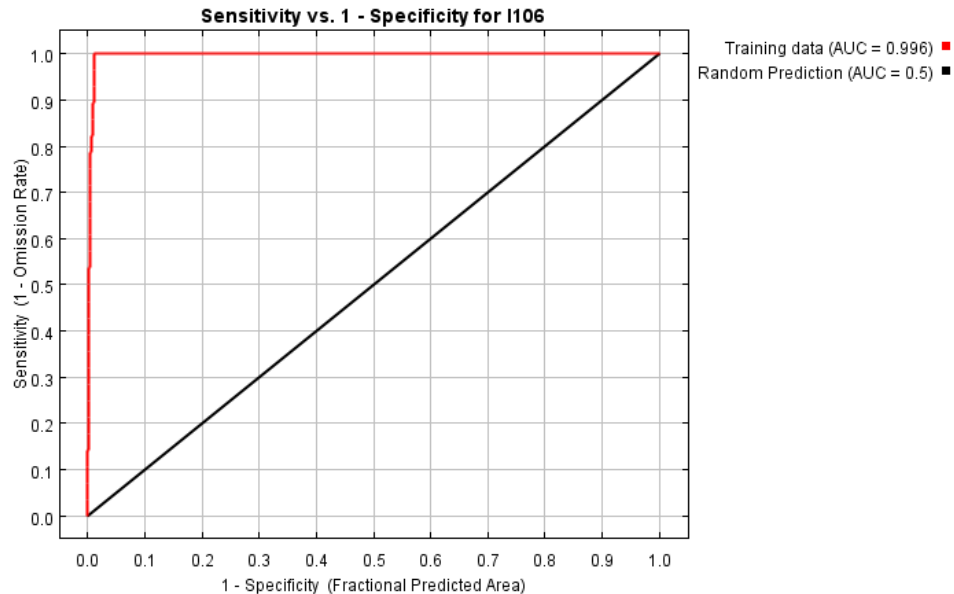

Figure S2f. The ROC curve for *Gnaphalium calviceps* under current climate.

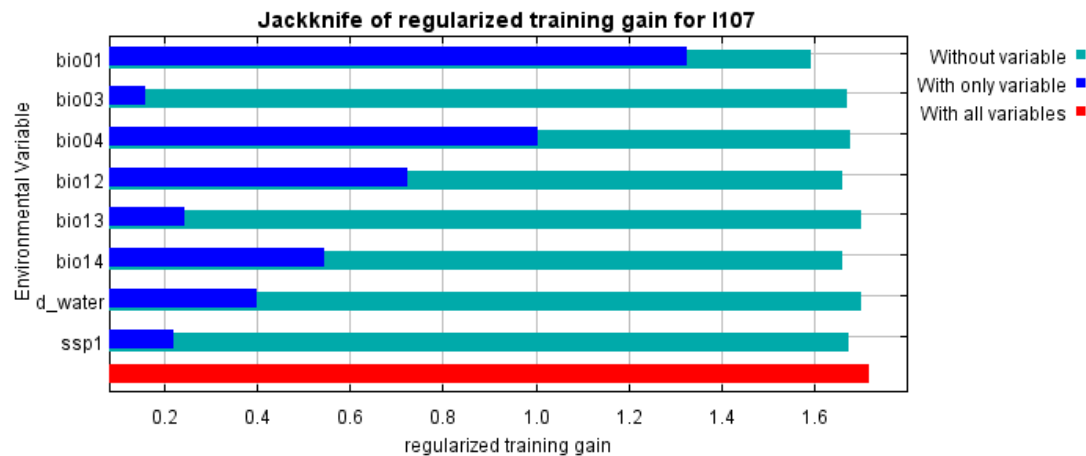

Figure S1g. The Jackknife test results for indicating the relative contribution of environmental variables for *Lolium multiflorum* var. *multiflorum*

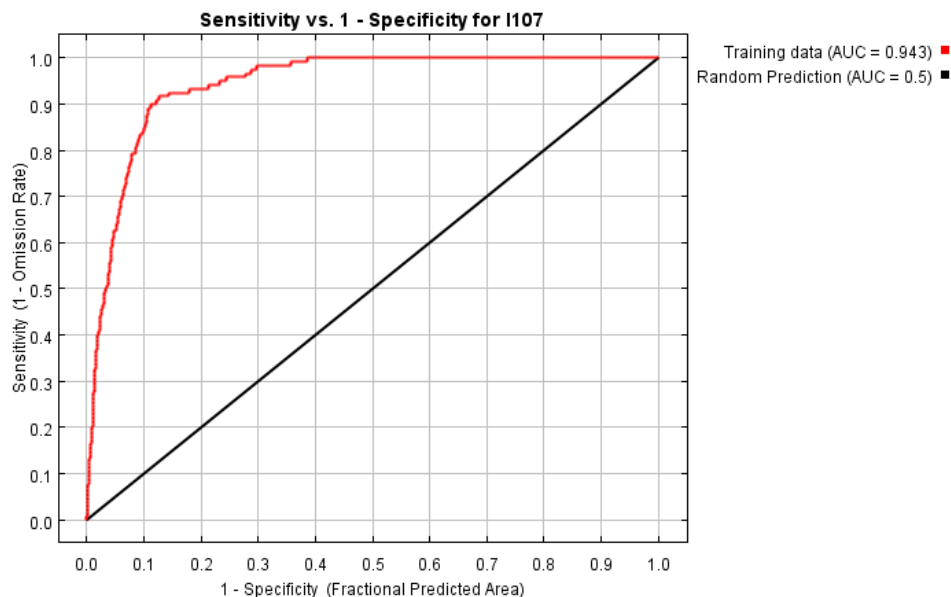

Figure S2g. The ROC curve for *Lolium multiflorum* var *multiflorum* under current climate.



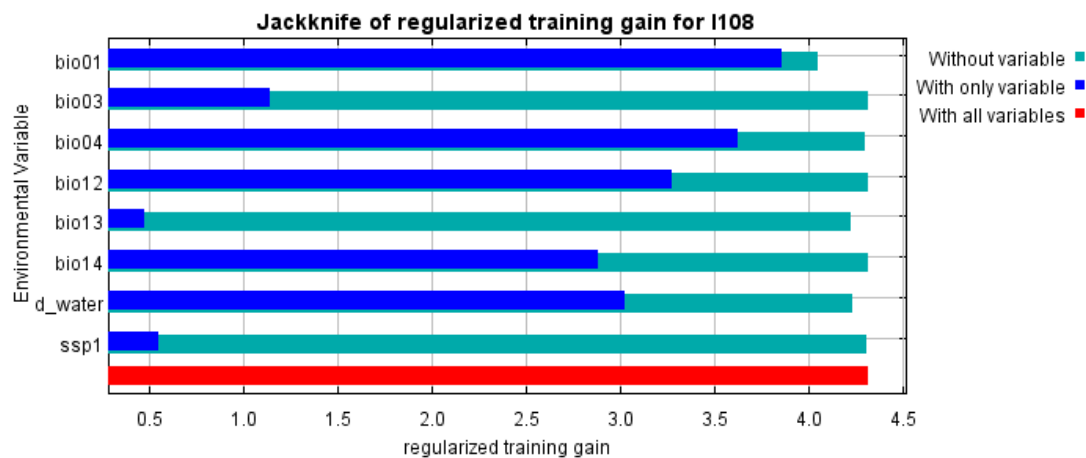

Figure S1h. The Jackknife test results for indicating the relative contribution of environmental variables for *Modiola caroliniana*

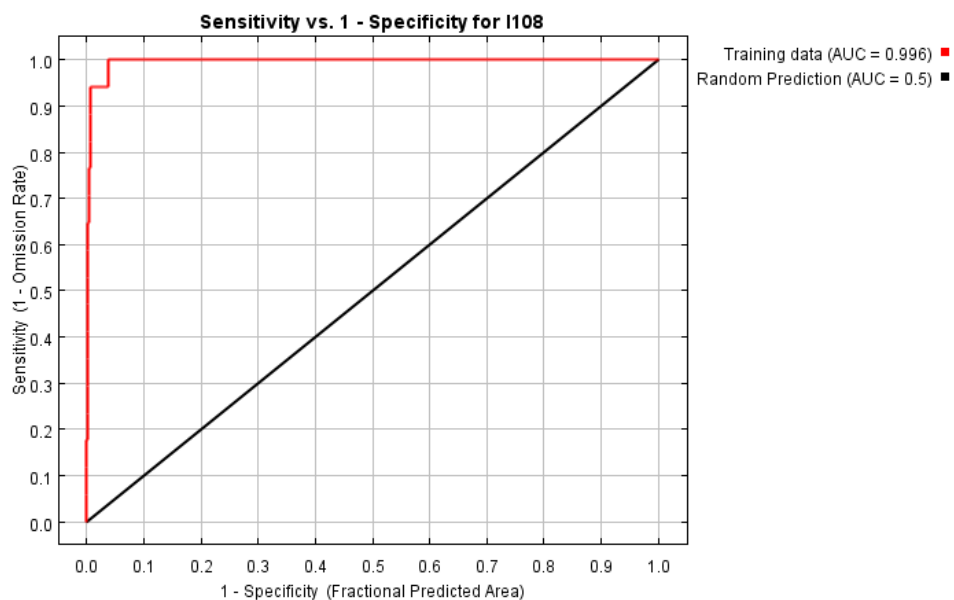

Figure S2h. The ROC curve for *Modiola caroliniana* under current climate.

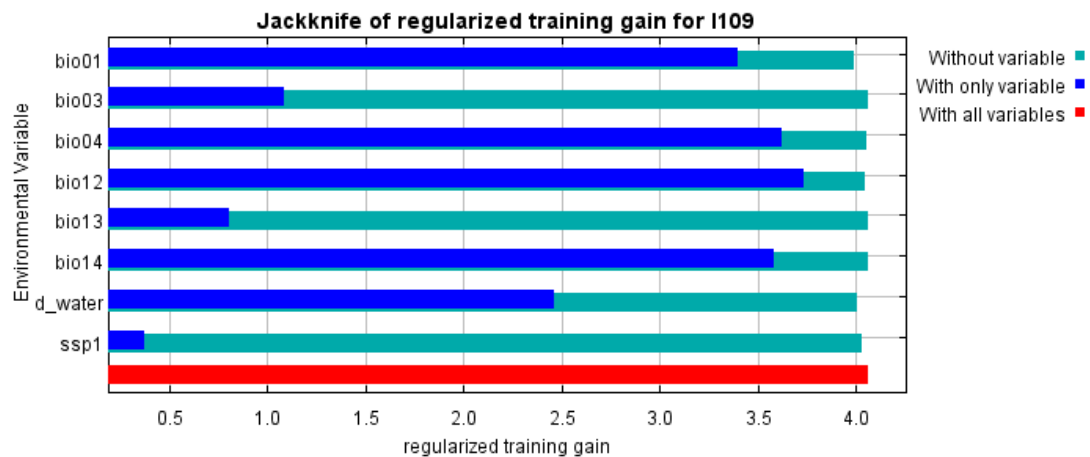

Figure S1i. The Jackknife test results for indicating the relative contribution of environmental variables for *Oenothera lacinata*

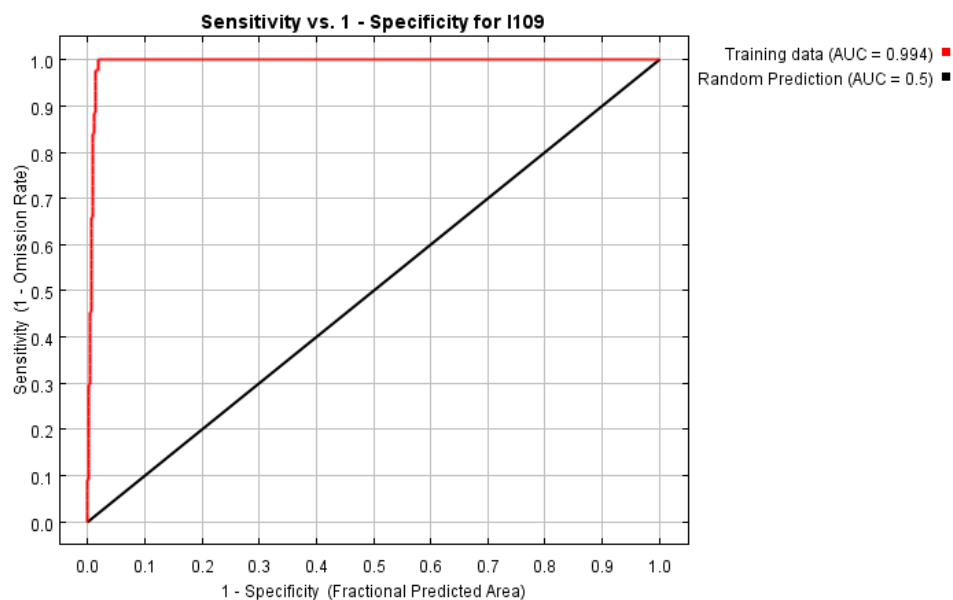

Figure S2i. The ROC curve for *Oenothera lacinata* under current climate.

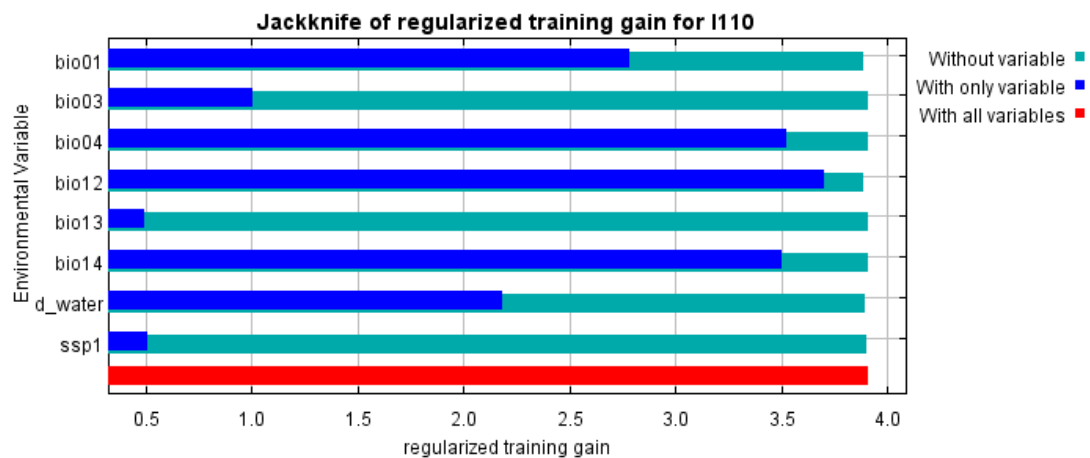

Figure S1j. The Jackknife test results for indicating the relative contribution of environmental variables for *Paspalum dilatatum*

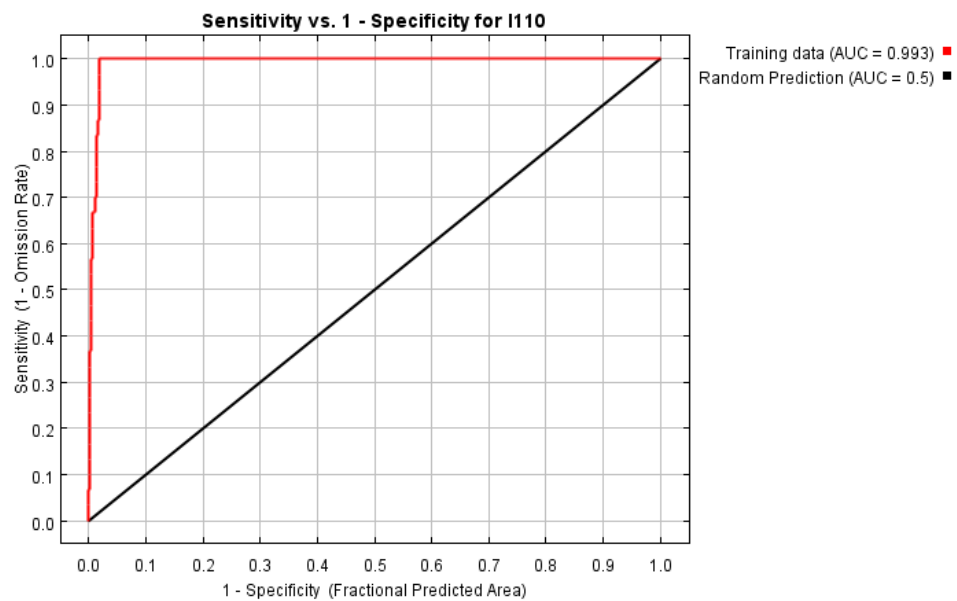

Figure S2j. The ROC curve for *Paspalum dilatatum* under current climate.

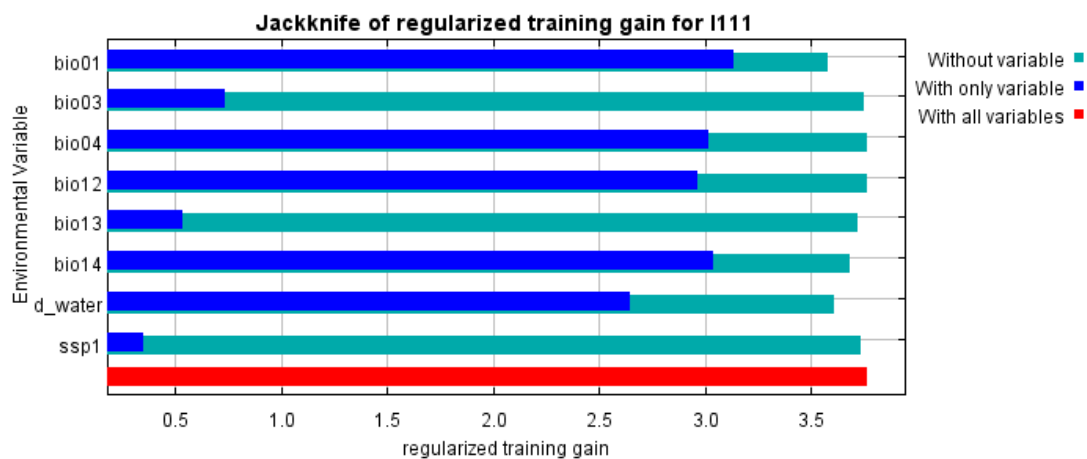

Figure S1k. The Jackknife test results for indicating the relative contribution of environmental variables for *Sida rhombifolia*

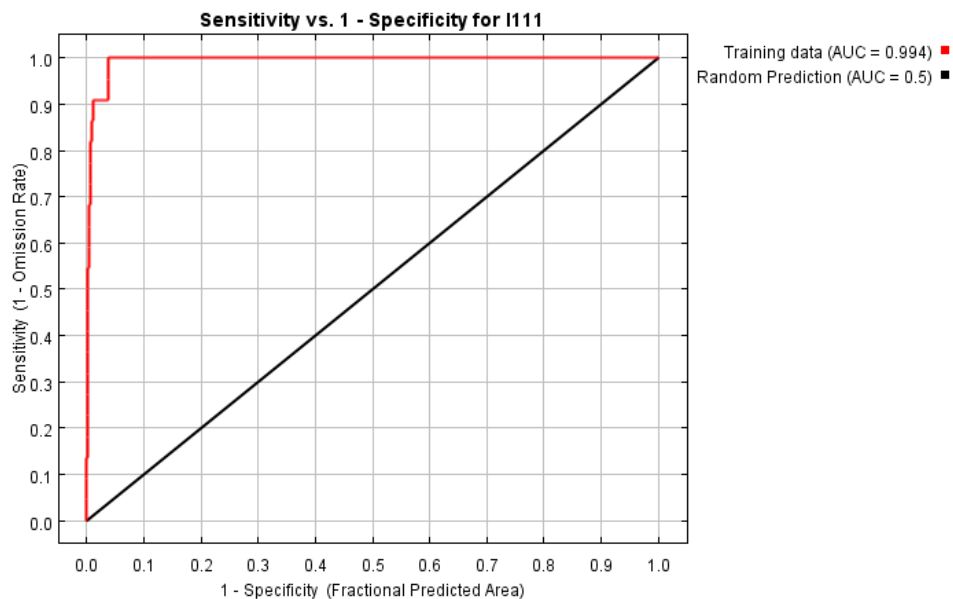

Figure S2k. The ROC curve for *Sida rhombifolia* under current climate.

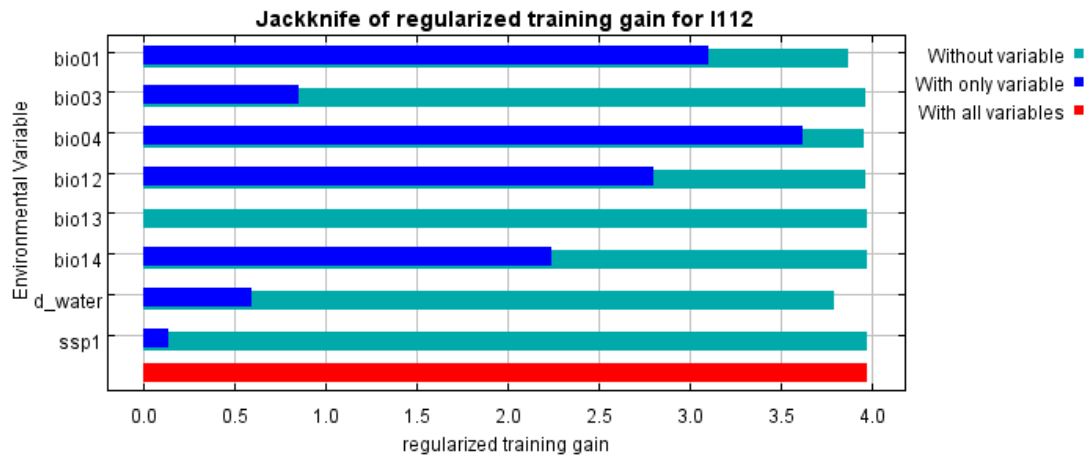

Figure S1l. The Jackknife test results for indicating the relative contribution of environmental variables for *Silene gallica* var. *gallica*

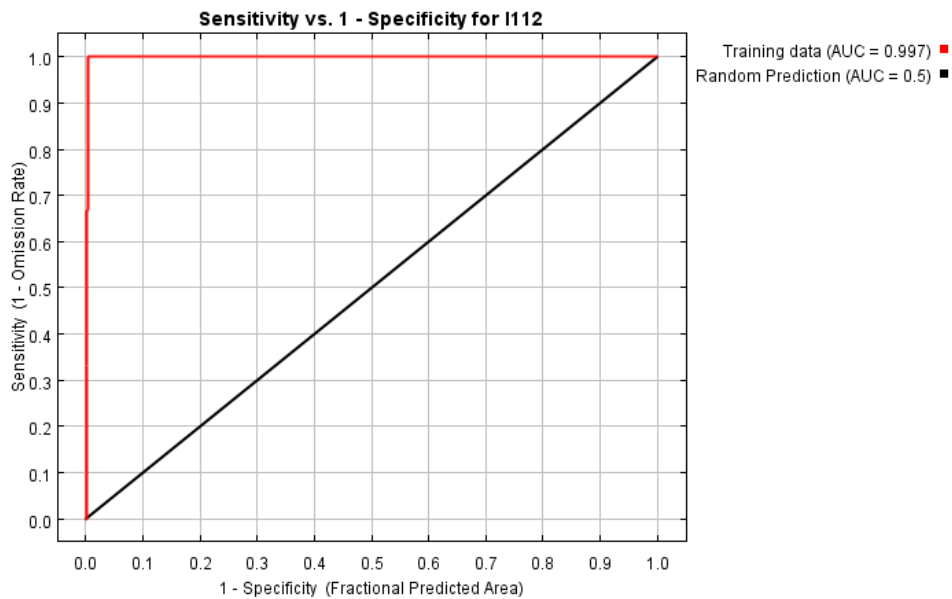

Figure S2l. The ROC curve for *Silene gallica* var. *gallica* under current climate.

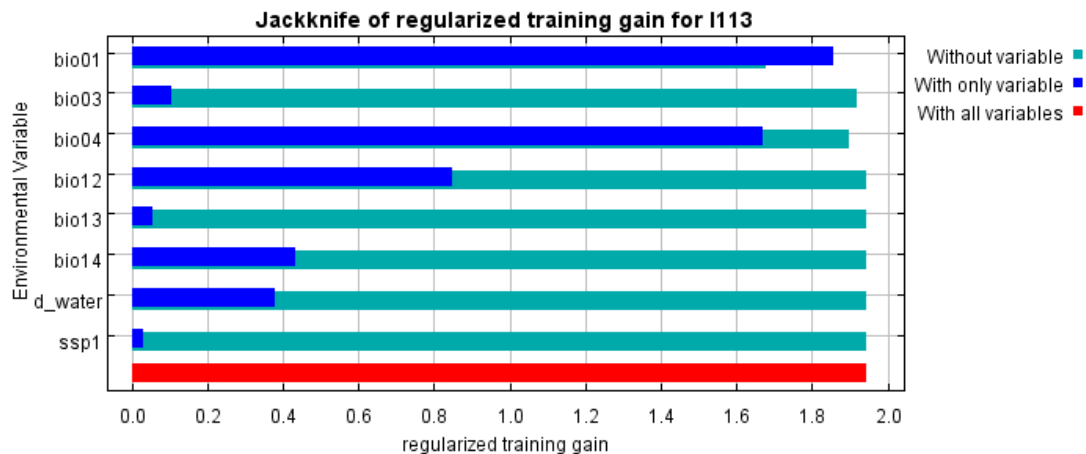

Figure S1m. The Jackknife test results for indicating the relative contribution of environmental variables for *Sisymbrium officinale*

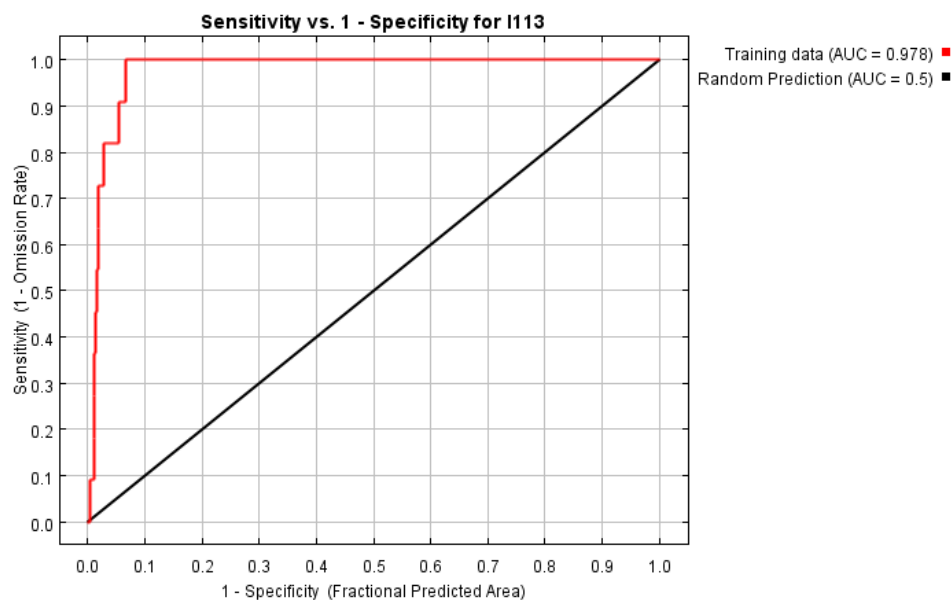

Figure S2m. The ROC curve for *Sisymbrium officinale* under current climate.

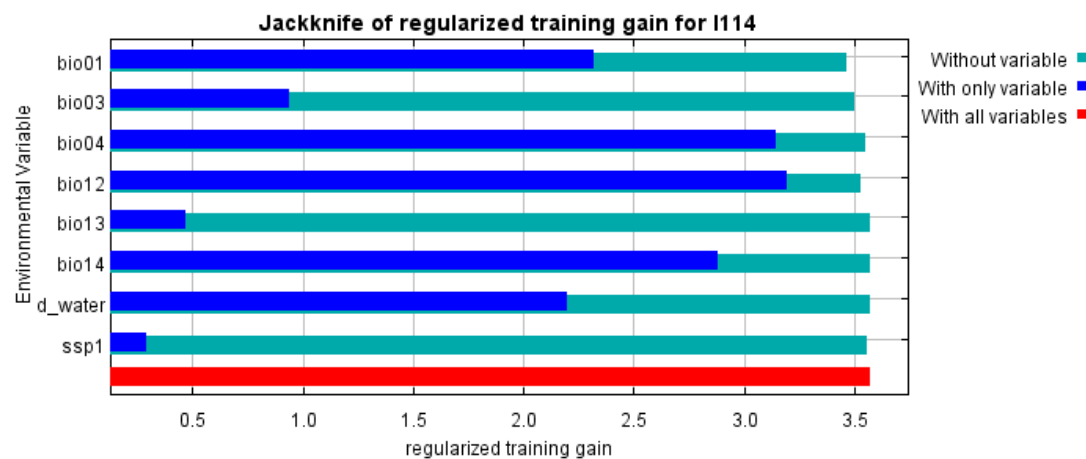

Figure S1n. The Jackknife test results for indicating the relative contribution of environmental variables for *Sisyrinchium angustifolium*

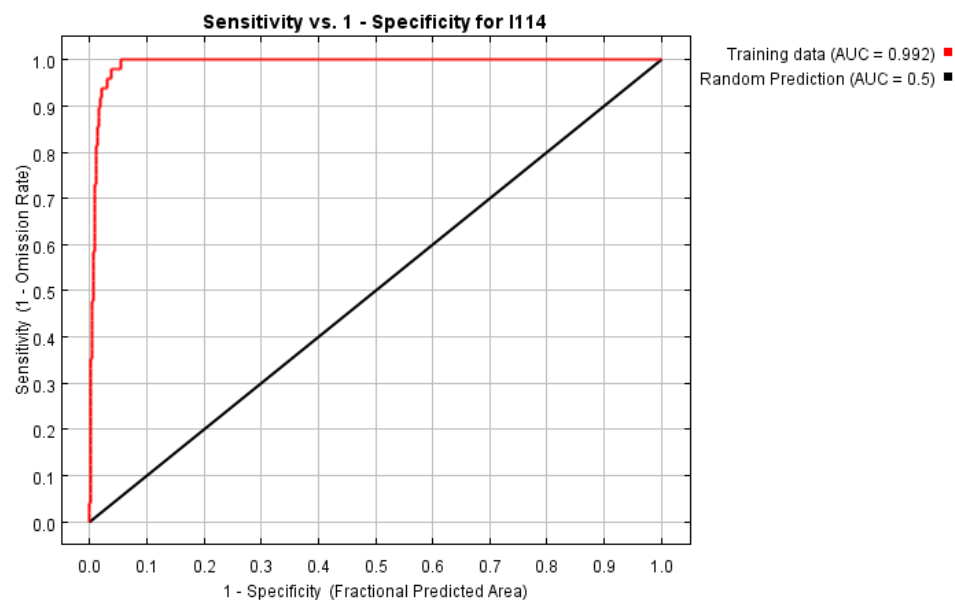

Figure S2n. The ROC curve for *Sisyrinchium angustifolium* under current climate.

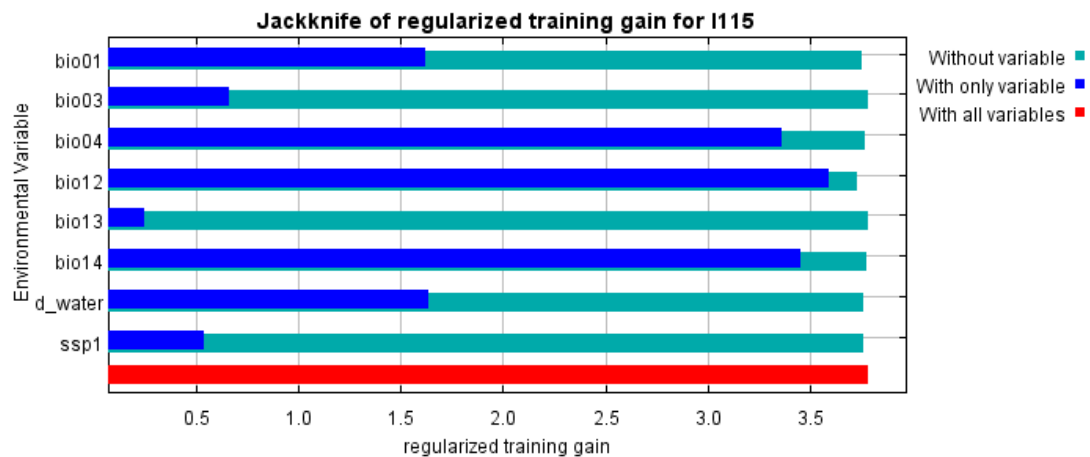

Figure S1o. The Jackknife test results for indicating the relative contribution of environmental variables for *Spergularia rubra*

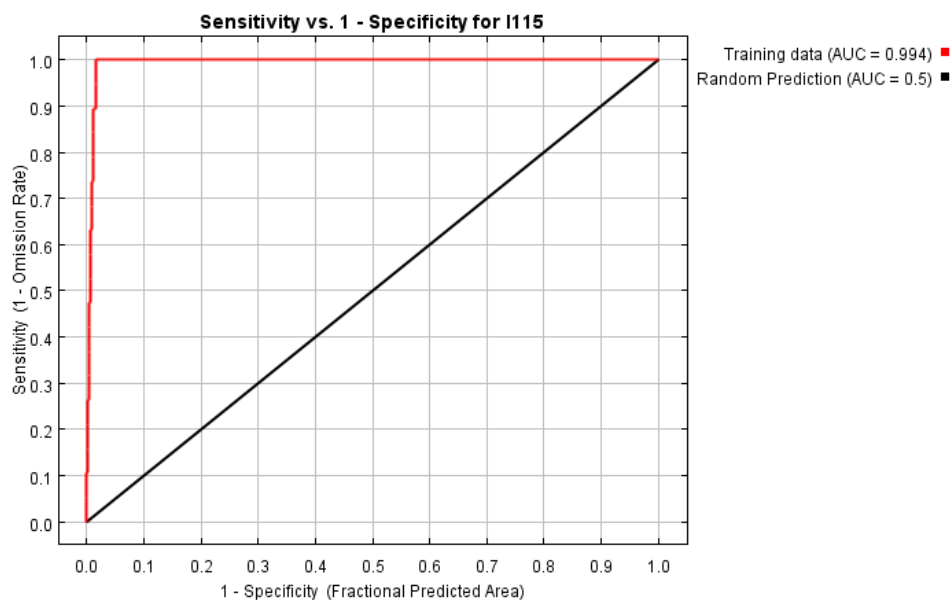

Figure S2o. The ROC curve for *Spergularia rubra* under current climate.



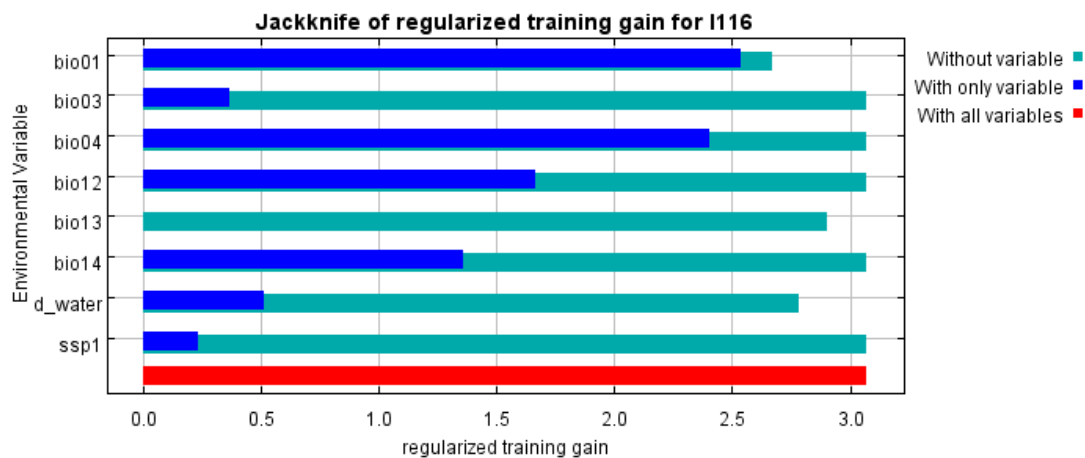

Figure S1p. The Jackknife test results for indicating the relative contribution of environmental variables for *Malva parviflora*

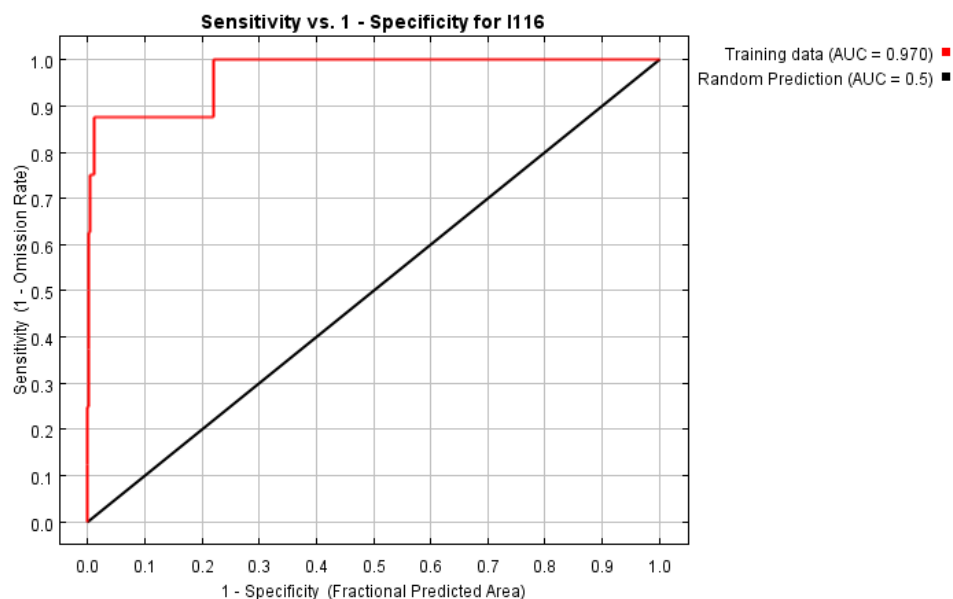

Figure S2p. The ROC curve for *Malva parviflora* under current climate.
